# Supplementary material for: Therapeutic base editing and prime editing of COL7A1 mutations in recessive dystrophic epidermolysis bullosa
Source: PubMed Central journal article supplement — Mol Ther. 2022 Jun 10;30(8):2664–79. doi: 10.1016/j.ymthe.2022.06.005 (PMC9372317; doi:10.1016/j.ymthe.2022.06.005), 2022-06-10
Supplement: mmc1.pdf [file mmc1.pdf]

YMTHE, Volume 30

## **Supplemental Information**

### **Therapeutic base editing and prime editing of *COL7A1* mutations in recessive dystrophic epidermolysis bullosa**

**Sung-Ah Hong, Song-Ee Kim, A-Young Lee, Gue-Ho Hwang, Jong Hoon Kim, Hiroaki Iwata, Soo-Chan Kim, Sangsu Bae, and Sang Eun Lee**

**Figure S1. Genotyping of RDEB patients using Nanopore long-read sequencing.** Schematic of *COL7A1* cDNA of Pat1 (A) and Pat2 (B) and Integrative Genomics Viewer (IGV) snapshots showing the alignment data at pathogenic mutations in *COL7A1* gene of Pat1 (A) and Pat2 (B). Each horizontal bar indicates one read and mutations are shown on the bars.

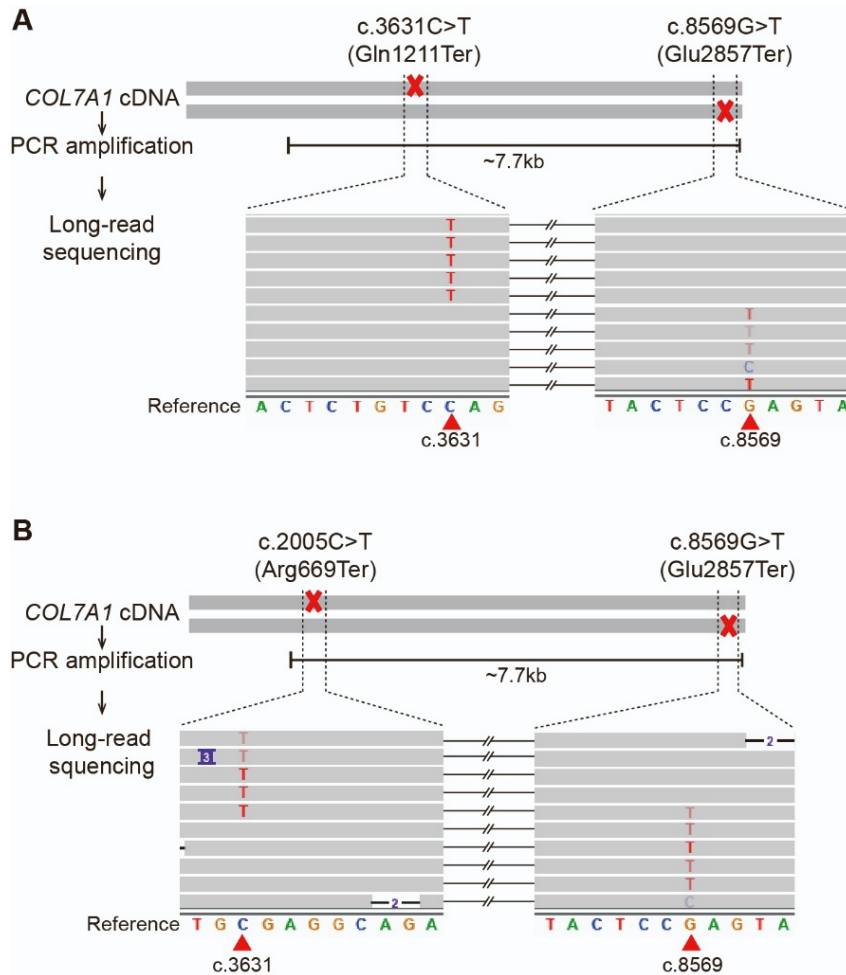

**Figure S2. Correction of the c.3631C>T mutation in COL7A1.** **A** Results from Sanger sequencing of targeted regions of the *COL7A1* cDNA from ABE-treated patient-derived fibroblasts. **B** Target sequences of pegRNAs and ngRNAs used for prime editing. **C** Results from Sanger sequencing of targeted regions of the *COL7A1* cDNA from PE-treated patient-derived fibroblasts.

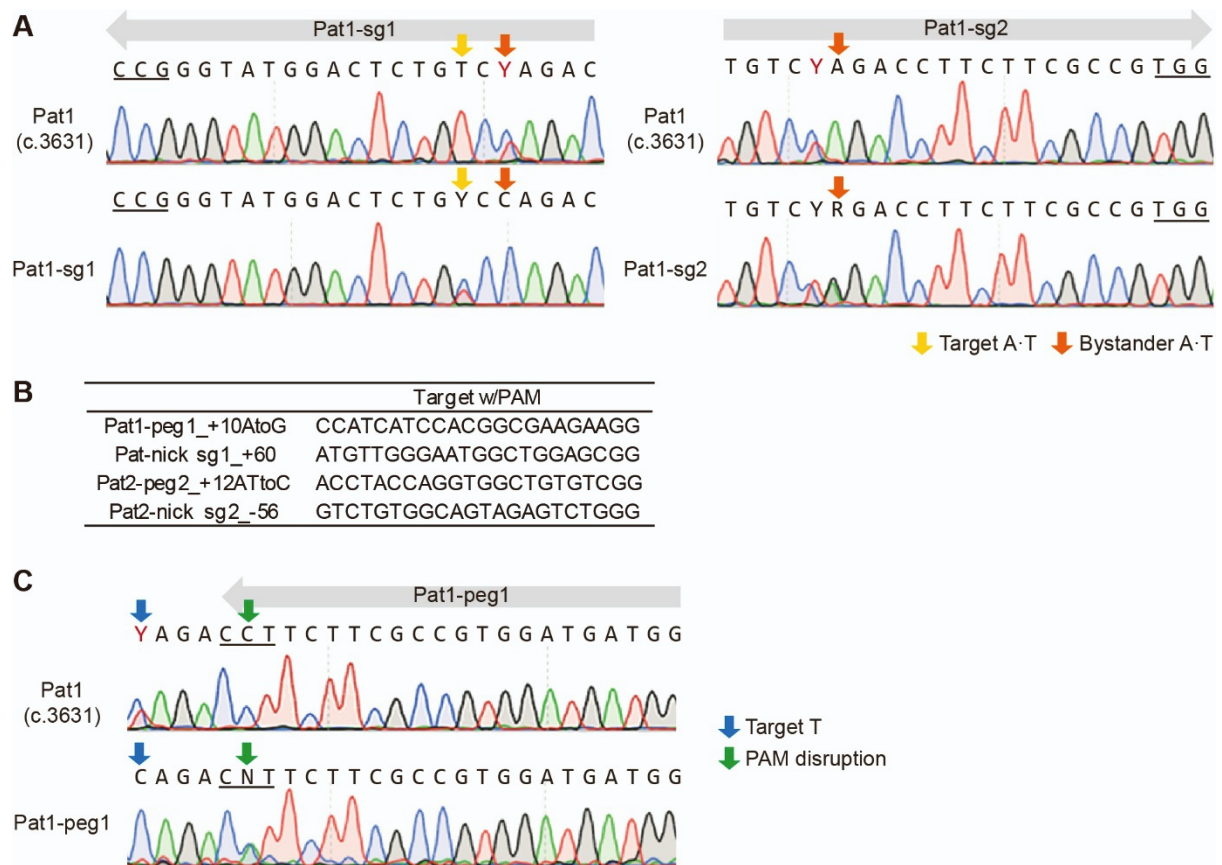

**Figure S3. Uncropped western blot images presented in Figure 2.** Western blot analysis of proteins from cell lysates (left) and conditioned media (right) of NHDF (lane 1), non-edited fibroblasts from Pat1 (lane 2), ABE/Pat1-sg1-treated RDEB fibroblasts (lane 3), and ABE/Pat1-sg2-treated RDEB fibroblasts (lane 4). The position of the band corresponding to full-length 290-kD type VII collagen (C7) is indicated. GAPDH was included as an internal control. Beta-actin is not detected in the culture supernatants of fibroblasts.

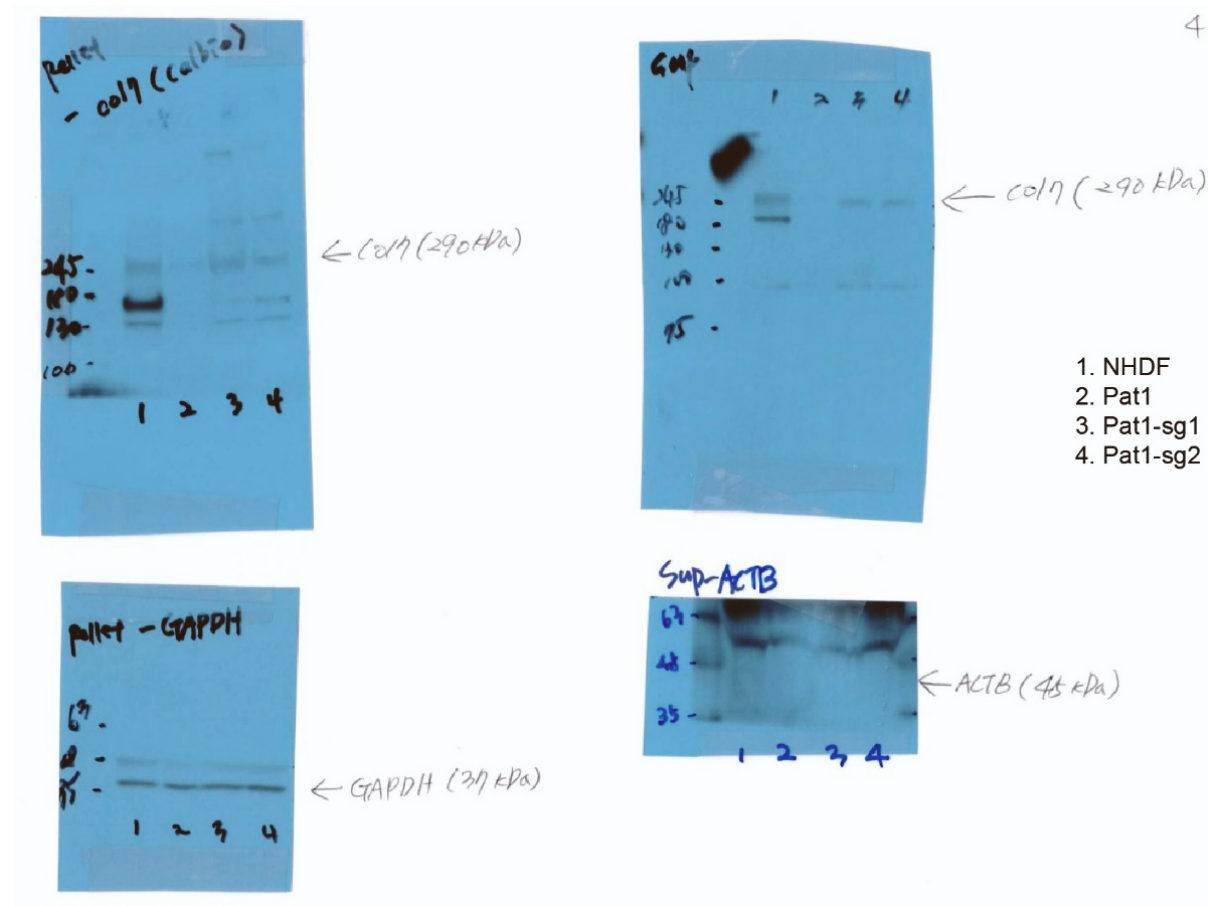

**Figure S4. Uncropped western blot images presented in Figure 3.** Western blot analysis of proteins from cell lysates (left) and conditioned media (right) of NHDF (lane 1), non-edited fibroblasts from Pat1 (lane 2), and PE3-treated RDEB fibroblasts (lane 3). The position of the band corresponding to full-length 290-kD type VII collagen (C7) is indicated. GAPDH was included as an internal control. Beta-actin is not detected in the culture supernatants of fibroblasts.

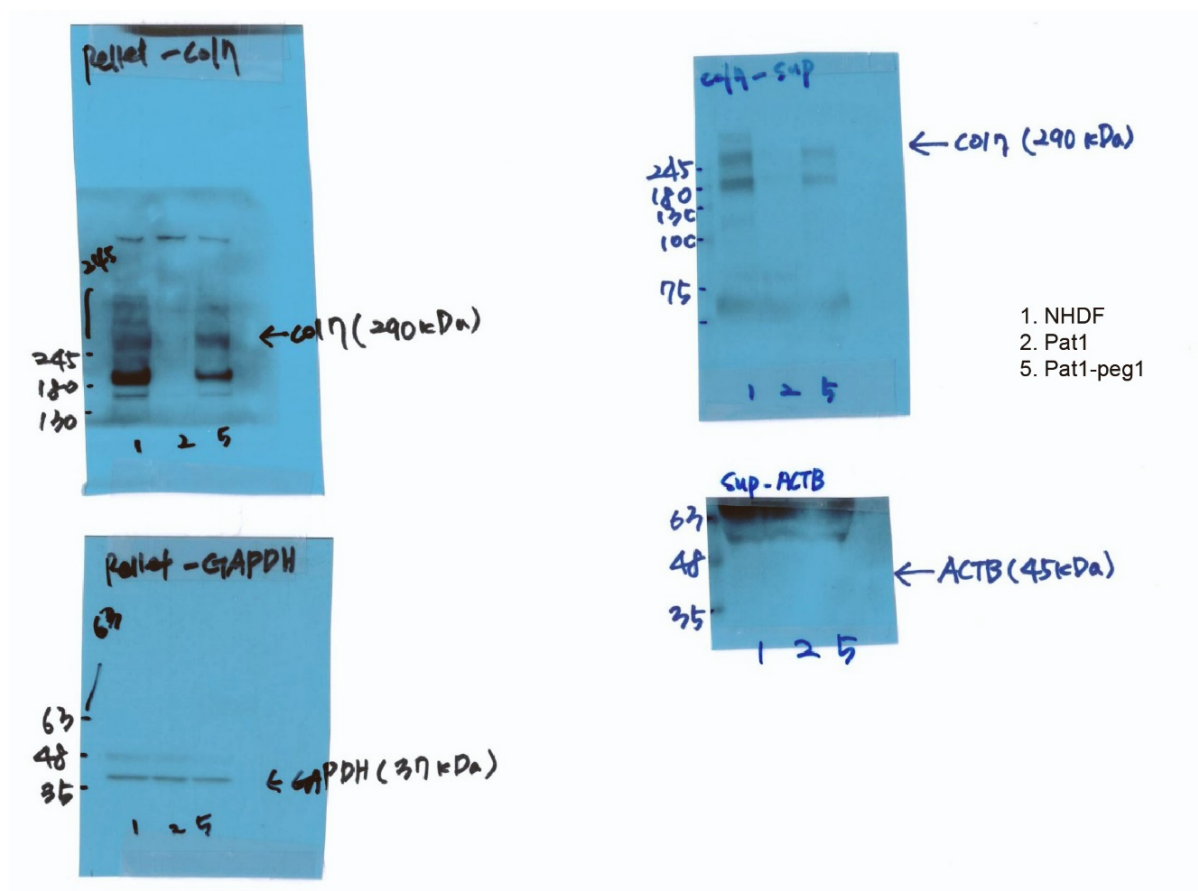

**Figure S5. Analysis of off-target effects in ABE-/PE-treated patient-derived fibroblasts.** **A** List of potential off-target sites with 1~3 mismatches relative to the target site. The potential off-target sites were found using Cas-OFFinder software. **B-D** A-to-G conversion rates (**B, C**) and indel frequencies (**D**) at *in silico* predicted off-target sites in ABE- or PE-treated patient-derived fibroblasts.

**A**

|           | OT# | DNA                      | Chr:position    | Direction | Mismatches | #Bulge type | Bulge Size |
|-----------|-----|--------------------------|-----------------|-----------|------------|-------------|------------|
| Pat1-sg1  | 1   | GTCTAGACAGAGTCCiTA-CAGG  | chr2:222668063  | -         | 1          | RNA         | 1          |
|           | 2   | cTCTAGACAGAGTCCcTcCCTGG  | chr16:65885523  | -         | 3          | X           | 0          |
|           | 3   | GTCTAGtCAGAcTCCcTACCTGG  | chr3:194986751  | +         | 3          | X           | 0          |
|           | 4   | GTCaAGaAaAGAGTCCAcACCAGG | chr2:237287245  | +         | 3          | X           | 0          |
|           | 5   | GTCTAGiCAGAGTCCaAaICCGG  | chr10:44910865  | +         | 3          | X           | 0          |
|           | 6   | aTCTAGCACAGAGaCCATACCAGG | chr15:54428712  | -         | 2          | DNA         | 1          |
|           | 7   | GTCATAGAaAGAGTCCAgACCTGG | chr8:128411500  | +         | 2          | DNA         | 1          |
|           | 8   | GTCTAGaAaAcAG-CCATACCTGG | chr11:64201596  | +         | 2          | RNA         | 1          |
|           | 9   | GTCcAGACAGAcTCC-TACCAGG  | chr11:125939426 | +         | 2          | RNA         | 1          |
|           | 10  | GTCTAG-CAGAGcCCATgCCAGG  | chr17:78370455  | +         | 2          | RNA         | 1          |
|           | 11  | GTCTA-ACAGAGTgtATACCTGG  | chr12:25153928  | +         | 2          | RNA         | 1          |
|           | 12  | GTCT-GgCAGAGTCCATcCCAGG  | chr19:37454846  | +         | 2          | RNA         | 1          |
|           | 13  | GTCTAGACAcAGT-aATACCTGG  | chr20:46249490  | -         | 2          | RNA         | 1          |
|           | 14  | GTCTgGAACAGAGTCCATgCCAGG | chr4:133163104  | -         | 2          | DNA         | 1          |
|           | 15  | tTaTAGACAGAGTcCTATACCAGG | chr2:168602331  | -         | 2          | DNA         | 1          |
|           | 16  | GTCcAGACAGAGT-CATACiTGG  | chr6:13201451   | +         | 2          | RNA         | 1          |
|           | 17  | GTCTAaACAGAGTiCATACCCTGG | chr1:176920267  | -         | 2          | DNA         | 1          |
|           | 18  | GTaTAGAt-GAGTCCATACCTGG  | chr1:81450137   | +         | 2          | RNA         | 1          |
|           | 19  | aTC-AGiCAGAGTCCATACCCTGG | chr5:82994985   | -         | 2          | RNA         | 1          |
|           | 20  | GTCT-GACAGAtTCaATACCAGG  | chr5:128797239  | +         | 2          | RNA         | 1          |
| Pat1-sg2  | 1   | TGTCTAaACCTTCTTC-CCiTGG  | chr8:137586826  | -         | 2          | RNA         | 1          |
|           | 2   | TGTCaAGACCTTCTTC-CaGAGG  | chr14:83115514  | -         | 2          | RNA         | 1          |
|           | 3   | TGTtTAiACCTTCTTC-CCGGGG  | chr17:45224139  | +         | 2          | RNA         | 1          |
|           | 4   | TiTCTAGACCTTCTT-GCaGTGG  | chr19:18447708  | +         | 2          | RNA         | 1          |
|           | 5   | TGT-TAGACCTaCTTiCCGGTGG  | chr22:22319369  | -         | 2          | RNA         | 1          |
| Pat1-peg1 | 1   | CCATC-TCCACGGCaAAGAAGG   | chr17:50569186  | -         | 1          | RNA         | 1          |
|           | 2   | CCiTCATCCACGGCcAAGcAGG   | chr16:47884695  | +         | 3          | X           | 0          |
|           | 3   | CCATgtTCCACGGCiAAGATGG   | chr15:68833313  | +         | 3          | X           | 0          |
|           | 4   | gCATgATCCACGGGaGAAGAAGG  | chr3:33989747   | -         | 3          | X           | 0          |
|           | 5   | tCAgCAgCCACGGCGAAGAGGG   | chr13:113920748 | -         | 3          | X           | 0          |
|           | 6   | CCATCATCCACGGCGggaAAGG   | chr2:219638783  | -         | 3          | X           | 0          |
|           | 7   | CCATCATCCctCiGCGAgGAAGG  | chr1:7492183    | +         | 3          | X           | 0          |
|           | 8   | CCATCATCCAtGGC-AgGAAGG   | chrX:18936163   | +         | 2          | RNA         | 1          |
|           | 9   | CCATCAT-CAaGgTGAAGATGG   | chrX:140206918  | +         | 2          | RNA         | 1          |
|           | 10  | CC-TCATCCAgGGaGAAGACGG   | chr16:73436845  | -         | 2          | RNA         | 1          |
|           | 11  | CCATCAT-CACaGCcAAGAAGG   | chr15:40931409  | +         | 2          | RNA         | 1          |
|           | 12  | CC-TCATCCACGGiGAAGiAGG   | chr11:119664880 | +         | 2          | RNA         | 1          |
|           | 13  | CCATCATCCACca-GAAGATGG   | chr3:162552242  | -         | 2          | RNA         | 1          |
|           | 14  | CCATCATCCA-GGtGgAGAAGG   | chr17:32990613  | +         | 2          | RNA         | 1          |
|           | 15  | CCATCAT-CAgGGiGAAGAAGG   | chr19:58435338  | +         | 2          | RNA         | 1          |
|           | 16  | CCATCATCCACGG-GAgGIAGG   | chr20:50499905  | -         | 2          | RNA         | 1          |
|           | 17  | CCA-CATCCAgGGaGAAGAGGG   | chr20:33019730  | -         | 2          | RNA         | 1          |
|           | 18  | CCATCATCCA-GGtGcAGAGGG   | chr6:42178418   | +         | 2          | RNA         | 1          |
|           | 19  | CC-TCATCCACiGgGAAGATGG   | chr10:78155109  | +         | 2          | RNA         | 1          |

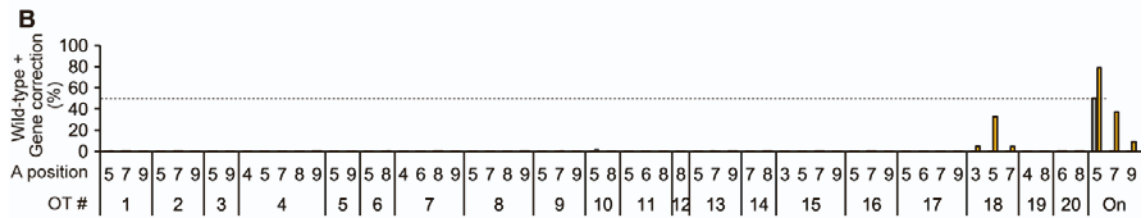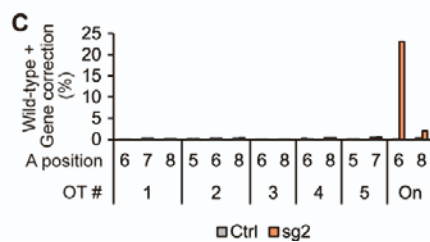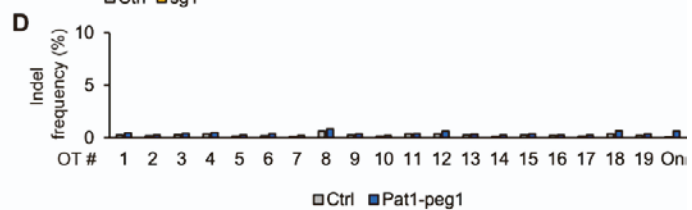

**Figure S6. Correction of the c.3631C>T mutation in COL7A1 in patient-derived keratinocytes. A** Information about the RDEB patient whose keratinocytes were used for the experiment. **B** Results from Sanger sequencing of targeted regions of the COL7A1 of genomic DNA from patient's blood. Red arrows indicate the mutations. **C, D** Conversion rate and indel frequency calculated by deep sequencing of genomic DNA from RDEB fibroblasts treated with ABE (**B**) and PE (**C**).

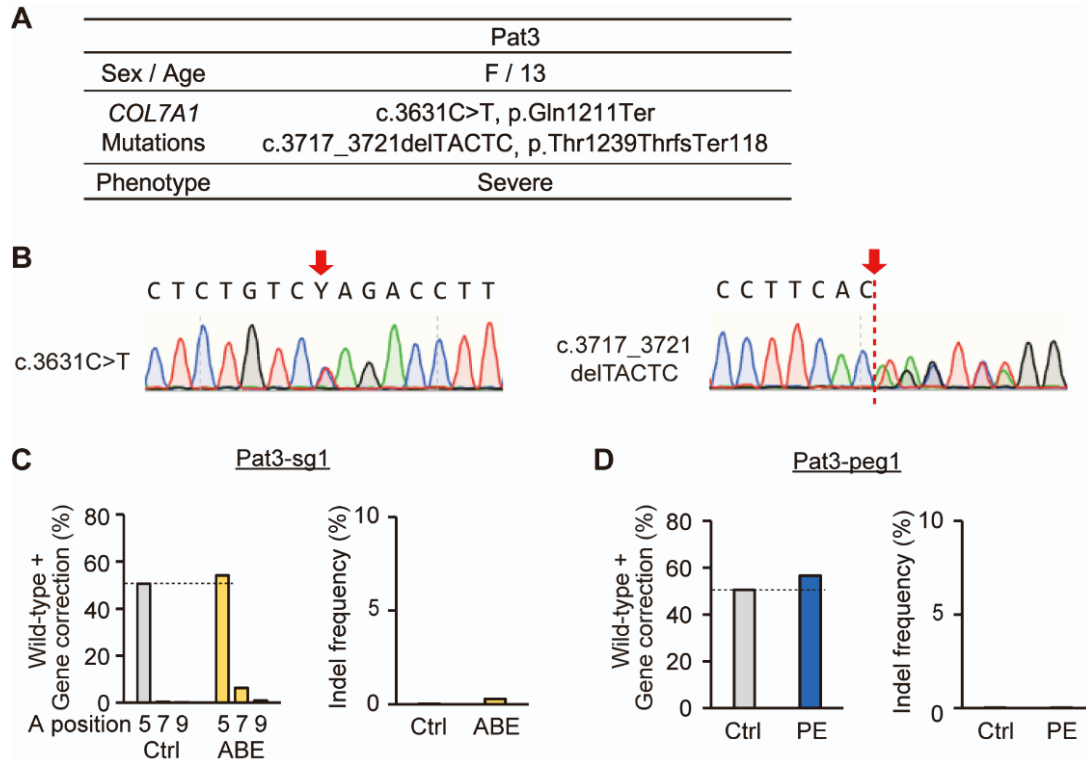

**Table S1.** Phenotypes and genotypes in Korean patients with RDEB. (Additional datasheet)

**Table S2.** Primers used for sequencing in this study. (Additional datasheet)

**Table S3.** Oligos used for sgRNA- and pegRNA-expressing plasmids in this study.

| Oligo name                | Sequence (5'to3')                                                       |
|---------------------------|-------------------------------------------------------------------------|
| Pat1-sg1_up               | CACCGGTCTAGACAGAGTCCATAACC                                              |
| Pat1-sg1_down             | AAACGGTATGGACTCTGTCTAGACC                                               |
| Pat1-sg2_up               | CACCGTGTCTAGACCTTCTTCGCCG                                               |
| Pat1-sg2_down             | AAACCGGCGAAGAAGGTCTAGACAC                                               |
| Pat1-peg1_up              | CACCGCCATCATCCACGGCGAAGAGTTTT                                           |
| Pat1-peg1_down            | CTCTAAAACCTTTCGCCGTGGATGATGGC                                           |
| Pat1-peg1_RTT14PBS15_up   | GTGCTGTCCAGACATTCTTCGCCGTGGATGATG                                       |
| Pat1-peg1_RTT14PBS15_down | AAAACATCATCCACGGCGAAGAATGTCTGGACA                                       |
| Pat1-peg1_RTT14PBS13_up   | GTGCTGTCCAGACATTCTTCGCCGTGGATGA                                         |
| Pat1-peg1_RTT14PBS13_down | AAAATCATCCACGGCGAAGAATGTCTGGACA                                         |
| Pat1-peg1_RTT14PBS11_up   | GTGCTGTCCAGACATTCTTCGCCGTGGAT                                           |
| Pat1-peg1_RTT14PBS11_down | AAAATCCACGGCGAAGAATGTCTGGACA                                            |
| Pet1-peg1_nick_+60_up     | CACCGATGTTGGGAATGGCTGGAG                                                |
| Pet1-peg1_nick_+60_down   | AAACCTCCAGCCATTCCCAACATC                                                |
| Pat2-peg2_up              | CACCGACCTACCAGGTGGCTGTGTGTTTT                                           |
| Pat2-peg2_down            | CTCTAAAACACACAGCCACCTGGTAGGTC                                           |
| Pat2-peg2_RTT14PBS15_up   | GTGCTCGCAGTACGGACACAGCCACCTGGTAGG                                       |
| Pat2-peg2_RTT14PBS15_down | AAAACCTACCAGGTGGCTGTGTCCGTACTGCGA                                       |
| Pat2-peg2_RTT14PBS13_up   | GTGCTCGCAGTACGGACACAGCCACCTGGTA                                         |
| Pat2-peg2_RTT14PBS13_down | AAAATACCAGGTGGCTGTGTCCGTACTGCGA                                         |
| Pat2-peg2_RTT14PBS11_up   | GTGCTCGCAGTACGGACACAGCCACCTGG                                           |
| Pat2-peg2_RTT14PBS11_down | AAAACCAGGTGGCTGTGTCCGTACTGCGA                                           |
| Pat2-peg2_nick_-56_up     | CACCGGTCTGTGGCAGTAGAGTCT                                                |
| Pat2-peg2_nick_-56_down   | AAACAGACTCTACTGCCACAGACC                                                |
| Scaffold_up               | AGAGCTAGAAATAGCAAGTTAAAATAAGGCTAGTCCGTTATC<br>AACTTGAAAAAGTGGCACCGAGTCG |
| Scaffold_down             | GCACCGACTCGGTGCCACTTTTTCAAGTTGATAACGGACTAG<br>CCTTATTTTAACTTGCTATTTCTAG |
